# Supplementary material for: Longitudinal Genome-Wide Association of Cardiovascular Disease Risk Factors in the Bogalusa Heart Study
Source: PubMed Central journal article supplement (PMC2936521; doi:10.1371/journal.pgen.1001094), 2010-09-09

# Exam dates for 525 EA individuals in BHS

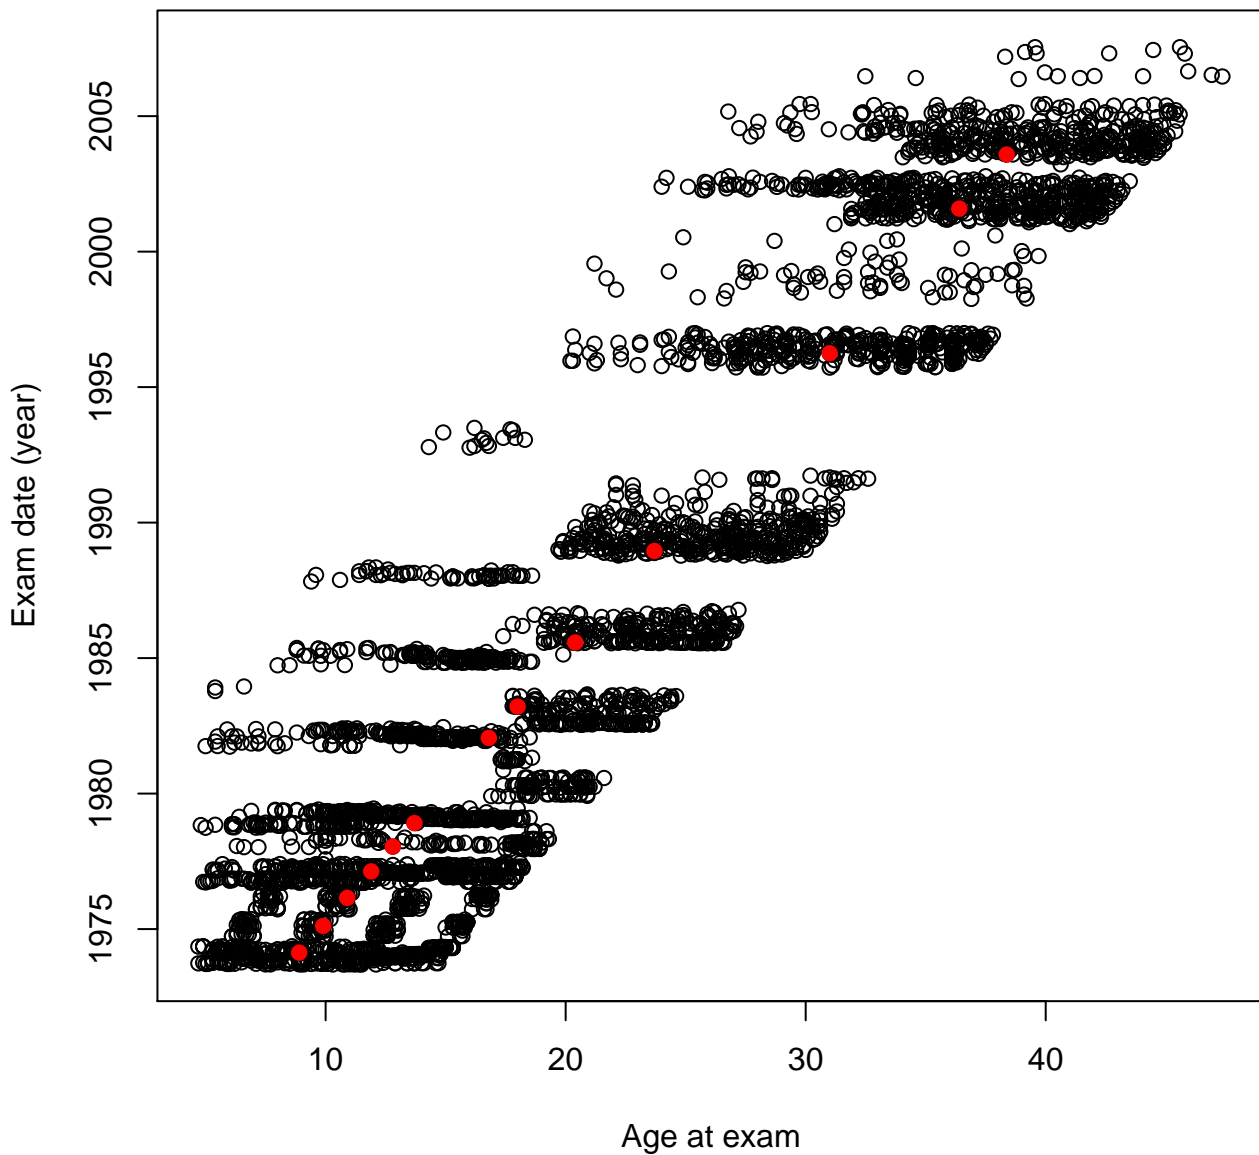

Supplement: pgen.1001094.s004.pdf [file pgen.1001094.s004.pdf]
